# Supplementary material for: Application of Metal-Organic Framework Nano-MIL-100(Fe) for Sustainable Release of Doxycycline and Tetracycline
Source: PubMed Central journal article supplement (PMC5575697; doi:10.3390/nano7080215), 2017-08-06
Supplement: nanomaterials-07-00215-s001.pdf [file nanomaterials-07-00215-s001.pdf]

Supporting information for

Article

# Application of Nano-MIL-100(Fe) for Sustainable Release of Doxycycline and Tetracycline

Seyed Dariush Taherzade <sup>1</sup>, Janet Soleimannejad <sup>1\*</sup>, and Aliakbar Tarlani <sup>2</sup>

\* Correspondence: janet\_soleimannejad@khayam.ut.ac.ir; Tel.: +98-21- 66495291

Table S1. Tetracycline structural analysis.

|                                                                                     |                                                                                                                                   |
|-------------------------------------------------------------------------------------|-----------------------------------------------------------------------------------------------------------------------------------|
| 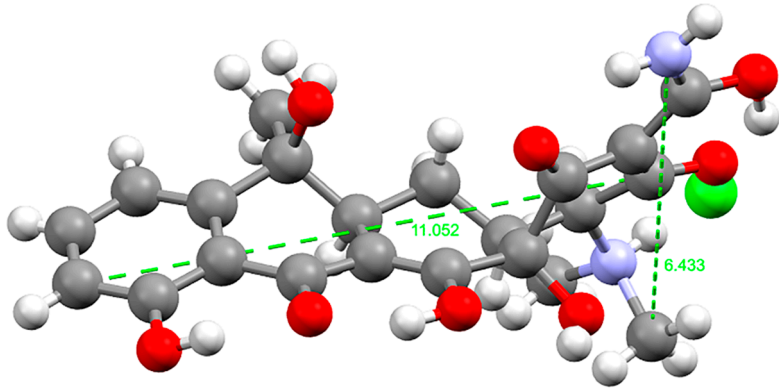 |                                                                                                                                   |
| Chemical name                                                                       | Tetracycline Hydrochloride                                                                                                        |
| Molecular Formula                                                                   | C <sub>22</sub> H <sub>24</sub> N <sub>2</sub> O <sub>8</sub>                                                                     |
| Molecular Weight                                                                    | 444.44 g/mol                                                                                                                      |
| IUPAC name                                                                          | (4S,4aS,5aS,6S,12aR)-4-(dimethylamino)-1,6,10,11,12a-pentahydroxy-6-methyl-3,12-dioxo-4,4a,5,5a-tetrahydrotetracene-2-carboxamide |
| Hydrogen Bond Donor Count                                                           | 6                                                                                                                                 |
| Hydrogen Bond Acceptor Count                                                        | 9                                                                                                                                 |
| Rotatable Bond Count                                                                | 2                                                                                                                                 |

**Table S2.** Doxycycline structural analysis.

|                                                                                    |                                                                                                                                                  |
|------------------------------------------------------------------------------------|--------------------------------------------------------------------------------------------------------------------------------------------------|
| 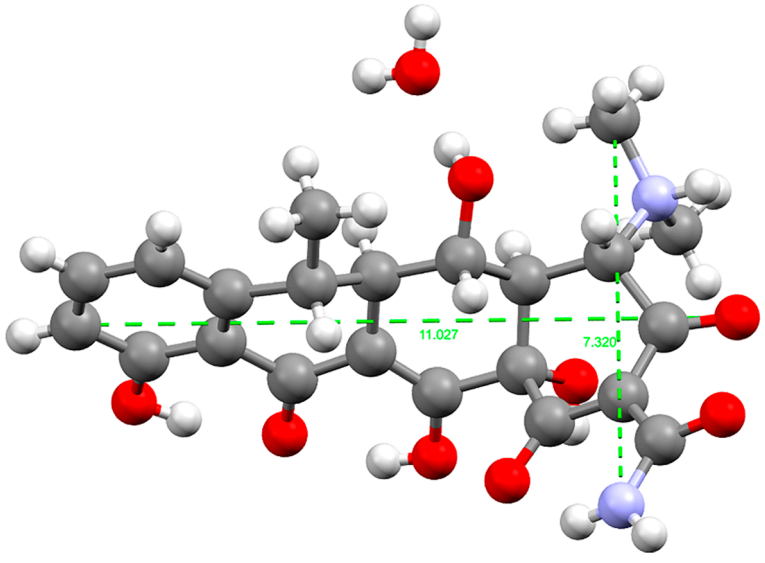 |                                                                                                                                                  |
| Chemical name                                                                      | Doxycycline Monohydrate                                                                                                                          |
| Molecular Formula                                                                  | C <sub>22</sub> H <sub>26</sub> N <sub>2</sub> O <sub>9</sub>                                                                                    |
| Molecular Weight                                                                   | 462.455 g/mol                                                                                                                                    |
| IUPAC name                                                                         | (4S,4aR,5S,5aR,6R,12aR)-4-(dimethylamino)-1,5,10,11,12a-pentahydroxy-6-methyl-3,12-dioxo-4a,5,5a,6-tetrahydro-4H-tetracene-2-carboxamide;hydrate |
| Hydrogen Bond Donor Count                                                          | 7                                                                                                                                                |
| Hydrogen Bond Acceptor Count                                                       | 10                                                                                                                                               |
| Rotatable Bond Count                                                               | 2                                                                                                                                                |

\*The above information is extracted from CIF (Crystal Information File).

The Scherrer Equation,  $\tau = \frac{K \times \lambda}{B \times \cos\theta}$ , as an accepted technique to calculate the nano-crystallite sizes ( $\tau$ ) by XRD, relates the diffraction from bragg planes ( $2\theta$ ) to the wavelength of X-ray radiation source ( $\lambda$ ) and the full width at half maximum of peaks (B) which is measured by applying the Gaussian profile on the main peak.

ES 1. Calculations on XRD pattern of nano-MIL-100.

$$\lambda = 1.54 \text{ \AA}, K = 0.89,$$

$$B = FWHM = 0.0016,$$

$$\tau = \frac{K \times \lambda}{B \times \cos\theta} = \frac{0.89 \times 0.154}{0.0016 \times 0.97} = 88 \text{ nm},$$

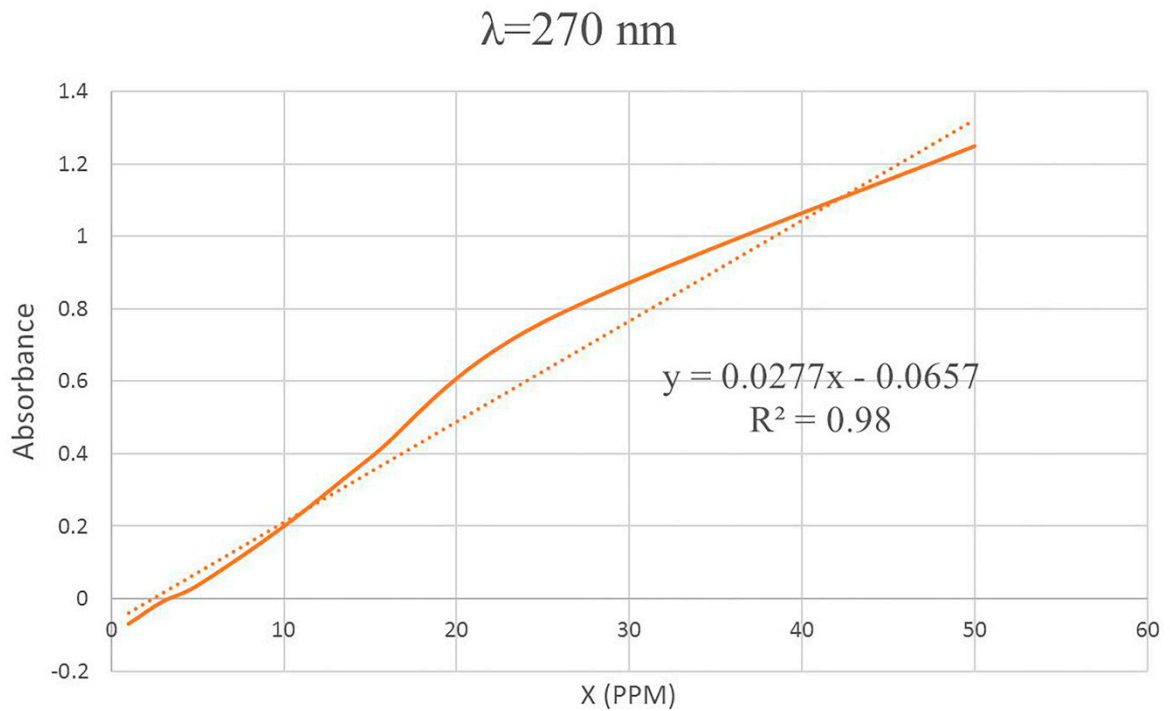

Figure S1. Calibration curve for tetracycline in different concentrations.

$\lambda=270$  nm

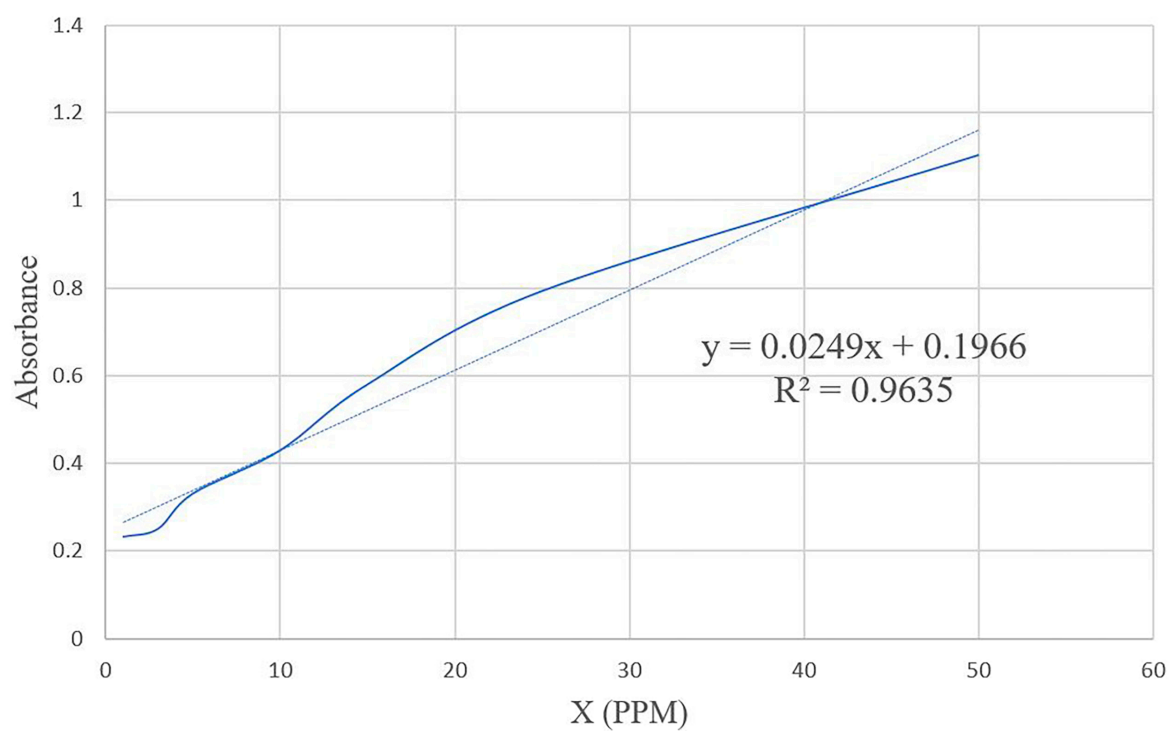

**Figure S2.** Calibration curve for Doxycycline in different concentrations.
